# Supplementary material
Source: ML conference proceedings conference paper supplement (https://openreview.net/forum?id=HDfQE1EWpC)

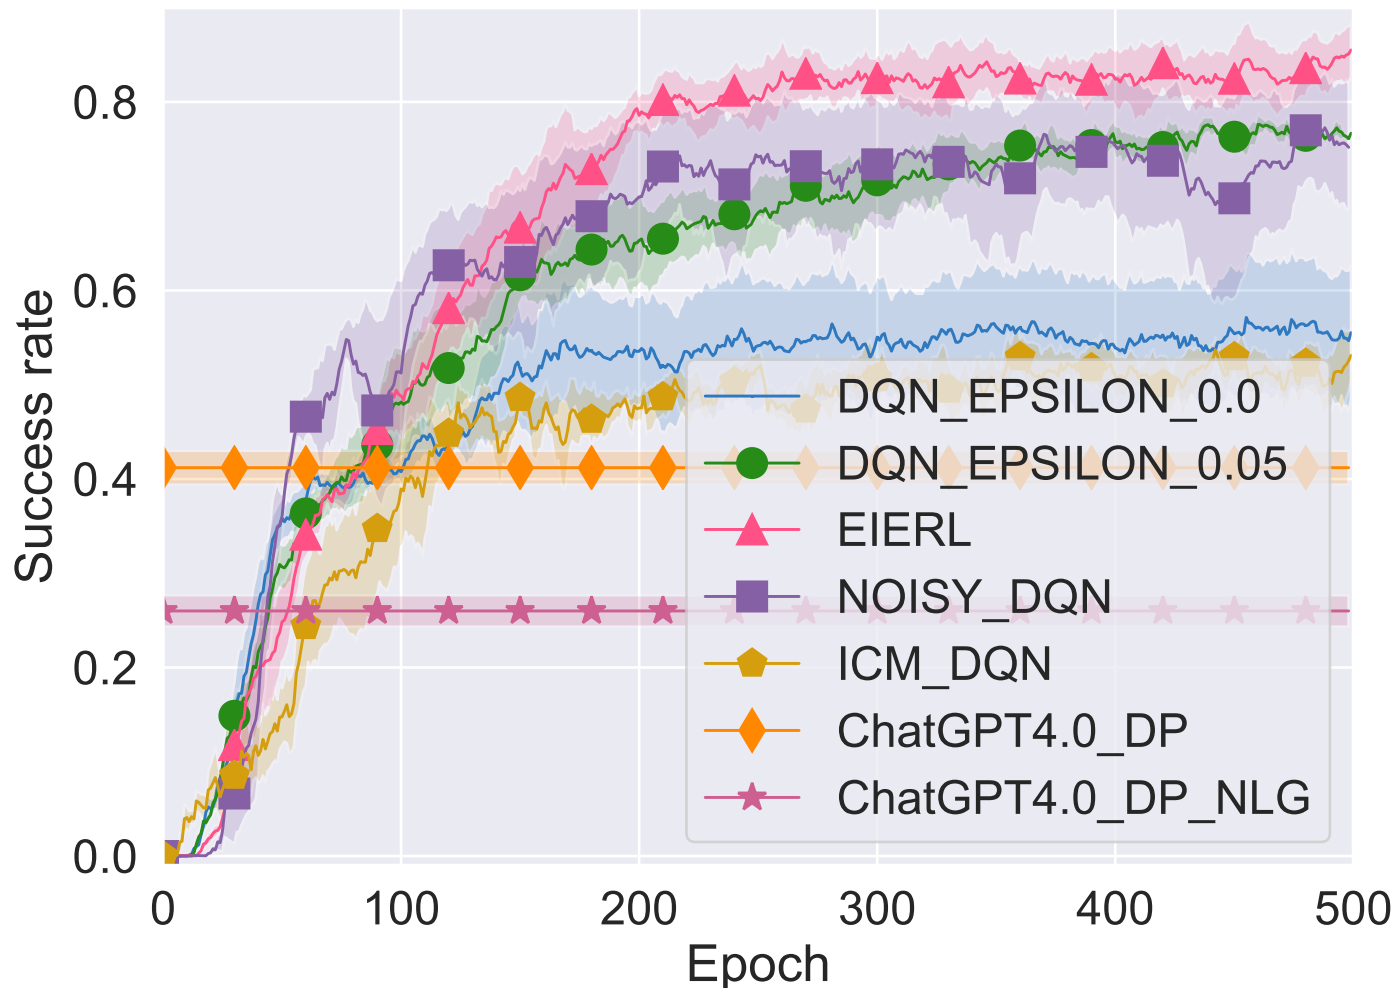

Supplement: supplementary_material [file figure.pdf › EIERL/src/deep_dialog/draw_figure/figure.pdf]
